# Supplementary material for: Learning from patients' written feedback: medical students' experiences
Source: PubMed Central journal article supplement (PMC9017500; doi:10.5116/ijme.61d5.8706), 2022-01-31
Supplement: ijme-13-19-S1.pdf [file ijme-13-19-S1.pdf]

## Appendix 1

The Patient's Feedback in Clinical Practice (PFCP) questionnaire, including descriptive statistics, for patients ( $N = 189$ ) feedback to medical students ( $N = 59$ )

| No  | The PFCP questionnaire questions                                                                                                          | Mean | SD   | Range |
|-----|-------------------------------------------------------------------------------------------------------------------------------------------|------|------|-------|
| 1.  | Did you have the opportunity to explain the reason for your visit or what had happened since you last visited the doctor?                 | 3.80 | 0.74 | 3 – 4 |
| 2.  | Did you have the opportunity to explain your own thoughts regarding your problems?                                                        | 3.81 | 0.68 | 1 – 4 |
| 3.  | Did you have the opportunity to explain if there was something that worried you regarding your problems?                                  | 3.66 | 0.98 | 1 – 4 |
| 4.  | Did you have the opportunity to express if there was something specific you wanted to be performed/initiated during the consultation?     | 3.51 | 1.2  | 1 – 4 |
| 5.  | Did the student confirm with you that he/she understood your cause of concern correctly by summarising what you told him/her?             | 3.69 | 0.94 | 2 – 4 |
| 6.  | Did the student explain his/her medical questions, so you understood why they were asked?                                                 | 3.22 | 1.38 | 1 – 4 |
| 7.  | During the clinical examination, did the student explain why certain examinations were performed?                                         | 3.30 | 1.31 | 1 – 4 |
| 8.  | Did the student take into consideration your own thoughts regarding your problem when you discussed the follow-up plan/treatment?         | 3.33 | 1.44 | 1 – 4 |
| 9.  | Did you receive information/explanation from the student which made it possible for you to participate in the planning of care/treatment? | 3.13 | 1.54 | 1 – 4 |
| 10. | Did the student provide information about suggested care/treatment in a way that you understood?                                          | 3.01 | 1.68 | 2 – 4 |
| 11. | Did the student provide information about medication in a way that you understood?                                                        | 1.89 | 1.96 | 2 – 4 |
| 12. | Did the student provide information in a way that you understood regarding symptoms that call for immediate contact with healthcare?      | 2.11 | 1.88 | 1 – 4 |
| 13. | Did the student ask if the information you were given was interpretable?                                                                  | 3.21 | 1.53 | 1 – 4 |
| 14. | Did you have the opportunity to bring up questions you had before the visit regarding your cause of concern?                              | 3.33 | 1.44 | 2 – 4 |
| 15. | Did the student involve you in the decision-making process regarding your care/treatment?                                                 | 3.07 | 1.61 | 2 – 4 |
| 16. | Were you involved in the decision-making process regarding your care/treatment to the extent you wanted?                                  | 3.19 | 1.53 | 2 – 4 |
| 17. | Are you satisfied with the initial plan that was decided upon together with the student?                                                  | 3.39 | 1.38 | 1 – 4 |
| 18. | Did you experience that the student treated you with compassion and consideration?                                                        | 3.91 | 0.47 | 2 – 4 |
| 19. | Did you experience that the student treated you with respect and dignity?                                                                 | 3.95 | 0.33 | 3 – 4 |
