# Supplementary material for: Learning from patients' written feedback: medical students' experiences
Source: PubMed Central journal article supplement (PMC9017500; doi:10.5116/ijme.61d5.8706), 2022-01-31
Supplement: ijme-13-19-S2.pdf [file ijme-13-19-S2.pdf]

## Appendix 2

The results from the qualitative content analysis of the patients' free-text comments from the PFCP questionnaire

| Clinical examination skills                                                                                                 | Request for additional information                                                                            | Positive affirmation, with concrete example                              | Targeting the patient's agenda                               |
|-----------------------------------------------------------------------------------------------------------------------------|---------------------------------------------------------------------------------------------------------------|--------------------------------------------------------------------------|--------------------------------------------------------------|
| <i>She was verbal, communicative throughout the encounter and had an easy touch while examining.</i>                        | <i>Please, tell me why you listen to my heart and maybe what you are searching for.</i>                       | <i>Very good questions, asked in a calm pace.</i>                        | <i>Received answers regarding my cause of concern.</i>       |
| <i>Listened to my lungs so gently.</i>                                                                                      | <i>You could explain why I should perform certain movements with my arms. What is it you are looking for?</i> | <i>Good and attentive listener. Took time to hear me out.</i>            | <i>Satisfied with the encounter and what it resulted in.</i> |
| <i>The clinical examination was conducted with knowledge and compassion, e.g., warmed the hands before the examination.</i> |                                                                                                               | <i>Superb encounter! The feeling of been taken completely seriously.</i> | <i>Went through my problem with thoroughness.</i>            |
|                                                                                                                             |                                                                                                               | <i>Good demeanour during the encounter, explained carefully.</i>         |                                                              |
